# Supplementary material for: Taurine Chloramine-Mediated Nrf2 Activation and HO-1 Induction Confer Protective Effects in Astrocytes
Source: MDPI journal article supplement (doi:10.3390/antiox13020169), 2024-01-29
Supplement: s1 [file s1]

Supplementary Figure S1

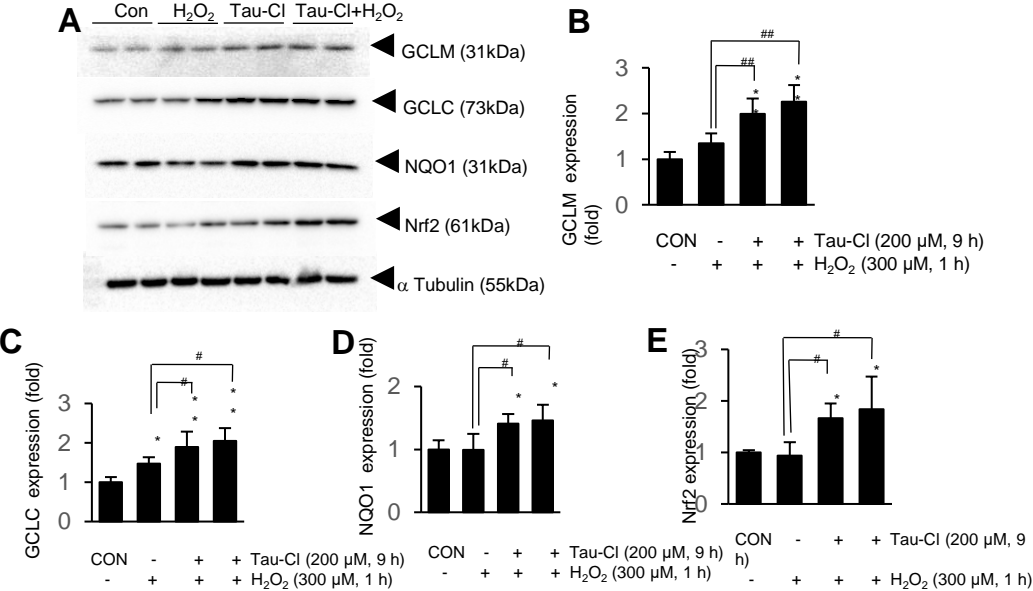

**Supplementary Figure S1. Up-regulations of genes downstream of Nrf2 by Tau-CI-pre-treatment in H<sub>2</sub>O<sub>2</sub>-treated C6 cells.**

C6 cells were pre-treated with 200 μM of Tau-CI for 9 h, and then treated with H<sub>2</sub>O<sub>2</sub> (300 μM) for 1 h. Levels of GCLM, GCLC, NQO1, and Nrf2 were determined at 6 h after H<sub>2</sub>O<sub>2</sub> treatment. Representative images are presented in A and quantified results are presented in B-E as mean ± SEM (n=4). \*p<0.05 and \*\*p<0.01 versus untreated controls, #p<0.05 and ##p<0.01 between indicated groups.
